# Supplementary material
Source: HighWire-hosted journal article supplement (https://bmjopen.bmj.com/content/12/2/e049951)
Supplement: inline-supplementary-material-1 [file inline-supplementary-material-1.pdf]

Original questions on feasibility and acceptance

#### Evaluation after module 1 – 4

|                                               | Very satisfied           | Satisfied                | Less satisfied           | Not satisfied            |
|-----------------------------------------------|--------------------------|--------------------------|--------------------------|--------------------------|
| How satisfied were you with the module today? | <input type="checkbox"/> | <input type="checkbox"/> | <input type="checkbox"/> | <input type="checkbox"/> |
|                                               | Very practical relevant  | Practical relevant       | Less practical relevant  | Not practical relevant   |
| How practical relevant was the module today?  | <input type="checkbox"/> | <input type="checkbox"/> | <input type="checkbox"/> | <input type="checkbox"/> |
|                                               | Strongly agree           | Agree                    | Disagree                 | Strongly disagree        |
| I can recommend the module.                   | <input type="checkbox"/> | <input type="checkbox"/> | <input type="checkbox"/> | <input type="checkbox"/> |

#### Evaluation of the whole intervention

The following questions relate to the whole training.

|                                           | Very satisfied           | Satisfied                | Less satisfied           | Not satisfied            |
|-------------------------------------------|--------------------------|--------------------------|--------------------------|--------------------------|
| How satisfied were you with the training? | <input type="checkbox"/> | <input type="checkbox"/> | <input type="checkbox"/> | <input type="checkbox"/> |
|                                           | Very practical relevant  | Practical relevant       | Less practical relevant  | Not practical relevant   |
| How practical relevant was the training?  | <input type="checkbox"/> | <input type="checkbox"/> | <input type="checkbox"/> | <input type="checkbox"/> |
|                                           | Strongly agree           | Agree                    | Disagree                 | Strongly disagree        |
| I can recommend the training.             | <input type="checkbox"/> | <input type="checkbox"/> | <input type="checkbox"/> | <input type="checkbox"/> |
